# Supplementary material for: Effect of Vitamin D Supplementation on Risk of Fractures and Falls According to Dosage and Interval: A Meta-Analysis
Source: PubMed Central journal article supplement — Endocrinol Metab (Seoul). 2022 Apr 25;37(2):344–58. doi: 10.3803/EnM.2021.1374 (PMC9081312; doi:10.3803/enm.2021.1374), 2022-04-25
Supplement: enm-2021-1374-suppl1.pdf [file enm-2021-1374-suppl1.pdf]

## SUPPLEMENTAL METHODS

### Detailed search strategy for the systematic review

#### PubMed

##### #1. Vitamin D Supplements

“Vitamin D”[MeSH] OR “Cholecalciferol”[MeSH] OR “ergocalciferols”[MeSH] OR “calcifediol”[MeSH] OR “25-hydroxyvitamin D”[Supplementary Concept] OR vitamin D[tiab] OR 25-hydroxyvitamin D[tiab] OR “25(OH)D”[tiab] OR “25(OH) vitamin D”[tiab] OR cholecalciferol\*[tiab] OR ergocalciferol\*[tiab] OR calcifediol\*[tiab]

##### #2. Fracture and fall

“Fractures, Bone”[MeSH] OR “Femoral Neck Fractures”[MeSH] OR “Spinal Fractures”[MeSH] OR “Fractures, Compression”[MeSH] OR “Hip Fractures”[MeSH] OR “Femoral Fractures”[MeSH] OR “Osteoporotic Fractures”[MeSH] OR “Accidental Falls”[MeSH] OR Fractur\*[tiab] OR Fall\*[tiab]

##### #3. RCT

Randomized Controlled Trial[MeSH] OR randomized controlled trial [pt] OR controlled clinical trial [pt] OR randomized [tiab] OR placebo [tiab]

##### #4. Children

"child"[MeSH] OR child\*[title]

##### #5. Animal

animals [mh] NOT humans [mh]

(#1 AND #2 AND #3) NOT (#4 OR #5)

#### EMBASE

##### #1. Vitamin D Supplements

‘25 hydroxyvitamin D’/exp OR Colecalciferol/exp OR Ergocalciferol/exp OR Calcifediol/exp OR ‘vitamin D’:ti,ab OR ‘25-hydroxyvitamin D’:ti,ab OR ‘25(OH)D’:ti,ab OR ‘25(OH) vitamin D’:ti,ab OR cholecalciferol\*:ti,ab OR ergocalciferol\*:ti,ab OR calcifediol\*:ti,ab

##### #2. Fracture and fall

Fracture/exp OR Falling/exp OR Fractur\*:ti,ab OR fall\*:ti,ab

##### #3. Children

child/exp OR child\*:ti,ab

##### #4. Animal

Animal/exp NOT human/exp

#1 AND #2 AND 'randomized controlled trial'/de NOT (#3 OR #4)

#### Cochrane Library

##### #1. Vitamin D Supplements

[mh “Vitamin D”] OR [mh Cholecalciferol] OR [mh ergocalciferols] OR [mh calcifediol] OR vitamin D:ti,ab,kw OR “25-hydroxyvitamin D”:ti,ab,kw OR “25(OH)D”:ti,ab,kw OR (25(OH) vitamin D):ti,ab,kw OR cholecalciferol\*:ti,ab,kw OR ergocalciferol\*:ti,ab,kw OR calcifediol\*:ti,ab,kw

##### #. Fracture and fall

[mh “Fractures, Bone”] OR [mh “Femoral Neck Fractures”] OR [mh “Spinal Fractures”] OR [mh “Fractures, Compression”] OR [mh “Hip Fractures”] OR [mh “Femoral Fractures”] OR [mh “Osteoporotic Fractures”] OR [mh “Accidental Falls”] OR Fractur\*:ti,ab,kw OR Fall\*:ti,ab,kw

##### #RCT

[mh Randomized Controlled Trial] OR [randomized controlled trial [pt] OR controlled clinical trial [pt] OR randomized:ti,ab,kw OR placebo:ti,ab,kw

##### #4. Children

[mh "child"] OR child\*:ti,ab,kw

##### #5. Animal

[mh animals] NOT [mh humans]

(#1 AND #2 AND #3) NOT (#4 OR #5)
