# Supplementary material for: Effect of Vitamin D Supplementation on Risk of Fractures and Falls According to Dosage and Interval: A Meta-Analysis
Source: PubMed Central journal article supplement — Endocrinol Metab (Seoul). 2022 Apr 25;37(2):344–58. doi: 10.3803/EnM.2021.1374 (PMC9081312; doi:10.3803/enm.2021.1374), 2022-04-25
Supplement: enm-2021-1374-suppl2.pdf [file enm-2021-1374-suppl2.pdf]

**Supplemental Table S1.** PRISMA-S Checklist

| Section/topic                          | #  | Checklist item                                                                                                                                                                                                                                                     | Location(s) reported |
|----------------------------------------|----|--------------------------------------------------------------------------------------------------------------------------------------------------------------------------------------------------------------------------------------------------------------------|----------------------|
| <b>Information sources and methods</b> |    |                                                                                                                                                                                                                                                                    |                      |
| Database name                          | 1  | Name each individual database searched, stating the platform for each.                                                                                                                                                                                             | 6                    |
| Multi-database searching               | 2  | If databases were searched simultaneously on a single platform, state the name of the platform, listing all of the databases searched.                                                                                                                             | 6                    |
| Study registries                       | 3  | List any study registries searched.                                                                                                                                                                                                                                | 6                    |
| Online resources and browsing          | 4  | Describe any online or print source purposefully searched or browsed (e.g., tables of contents, print conference proceedings, web sites), and how this was done.                                                                                                   | 6                    |
| Citation searching                     | 5  | Indicate whether cited references or citing references were examined, and describe any methods used for locating cited/citing references (e.g., browsing reference lists, using a citation index, setting up email alerts for references citing included studies). | 6                    |
| Contacts                               | 6  | Indicate whether additional studies or data were sought by contacting authors, experts, manufacturers, or others.                                                                                                                                                  | 6                    |
| Other methods                          | 7  | Describe any additional information sources or search methods used.                                                                                                                                                                                                | 6                    |
| <b>Search strategies</b>               |    |                                                                                                                                                                                                                                                                    |                      |
| Full search strategies                 | 8  | Include the search strategies for each database and information source, copied and pasted exactly as run.                                                                                                                                                          | Supplemental Methods |
| Limits and restrictions                | 9  | Specify that no limits were used, or describe any limits or restrictions applied to a search (e.g., date or time period, language, study design) and provide justification for their use.                                                                          | 6-7                  |
| Search filters                         | 10 | Indicate whether published search filters were used (as originally designed or modified), and if so, cite the filter(s) used.                                                                                                                                      | 6                    |
| Prior work                             | 11 | Indicate when search strategies from other literature reviews were adapted or reused for a substantive part or all of the search, citing the previous review(s).                                                                                                   | NA                   |
| Updates                                | 12 | Report the methods used to update the search(es) (e.g., rerunning searches, email alerts).                                                                                                                                                                         | NA                   |
| Dates of searches                      | 13 | For each search strategy, provide the date when the last search occurred.                                                                                                                                                                                          | 6                    |
| <b>Peer review</b>                     |    |                                                                                                                                                                                                                                                                    |                      |
| Peer review                            | 14 | Describe any search peer review process.                                                                                                                                                                                                                           | 7                    |
| <b>Managing records</b>                |    |                                                                                                                                                                                                                                                                    |                      |
| Total records                          | 15 | Document the total number of records identified from each database and other information sources.                                                                                                                                                                  | 8                    |
| Deduplication                          | 16 | Describe the processes and any software used to deduplicate records from multiple database searches and other information sources.                                                                                                                                 | 7                    |

Adapted from Rethlefsen et al. [14].

PRISMA, Preferred Reporting Items for Systematic Reviews and Meta-Analyses; NA, not available.
