# Supplementary material for: Effect of Vitamin D Supplementation on Risk of Fractures and Falls According to Dosage and Interval: A Meta-Analysis
Source: PubMed Central journal article supplement — Endocrinol Metab (Seoul). 2022 Apr 25;37(2):344–58. doi: 10.3803/EnM.2021.1374 (PMC9081312; doi:10.3803/enm.2021.1374), 2022-04-25
Supplement: enm-2021-1374-suppl3.pdf [file enm-2021-1374-suppl3.pdf]

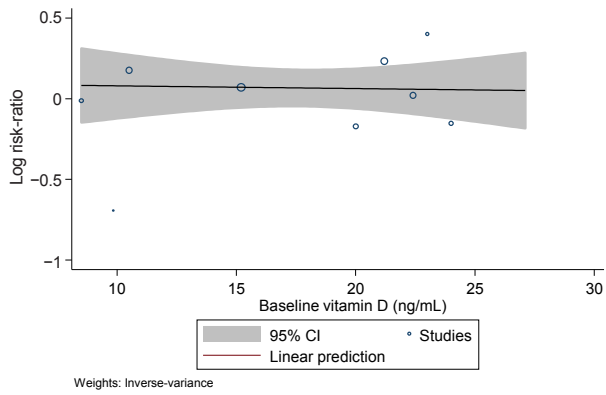

A

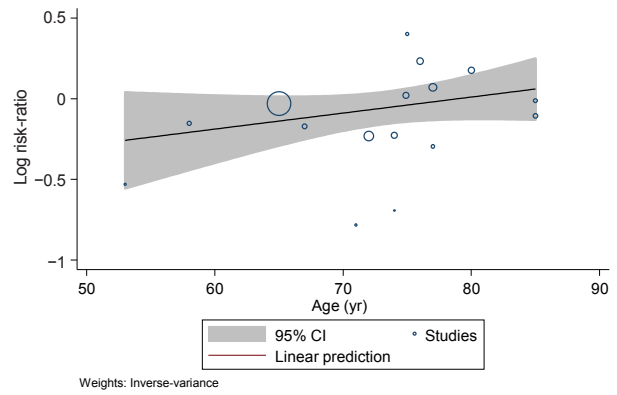

B

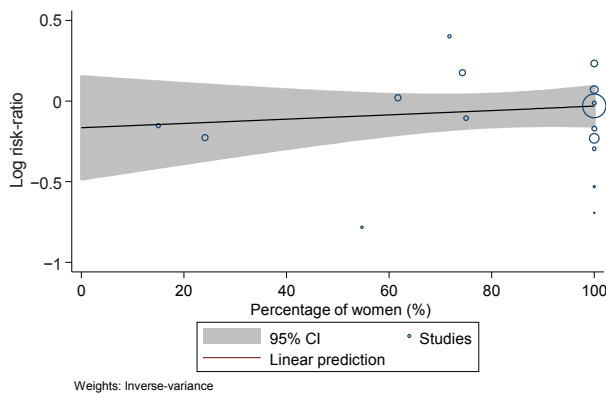

C

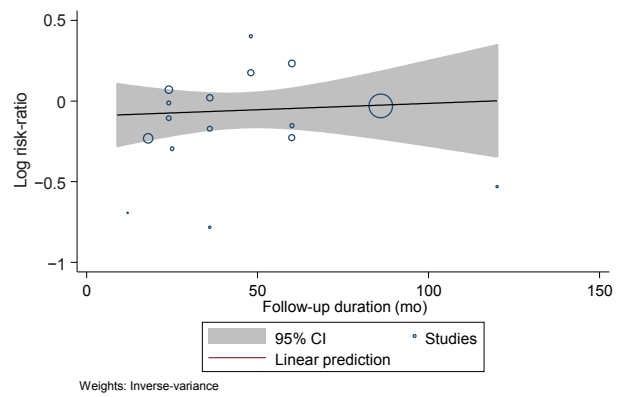

D

**Supplemental Fig. S1.** Meta-regression plot of risk of osteoporotic fractures with (A) baseline vitamin D level, (B) age, (C) percentage of women, and (D) follow-up duration. CI, confidence interval.
