# Supplementary figures and images for: Effect of Vitamin D Supplementation on Risk of Fractures and Falls According to Dosage and Interval: A Meta-Analysis
Source: PubMed Central journal article supplement — Endocrinol Metab (Seoul). 2022 Apr 25;37(2):344–58. doi: 10.3803/EnM.2021.1374 (PMC9081312; doi:10.3803/enm.2021.1374), 2022-04-25

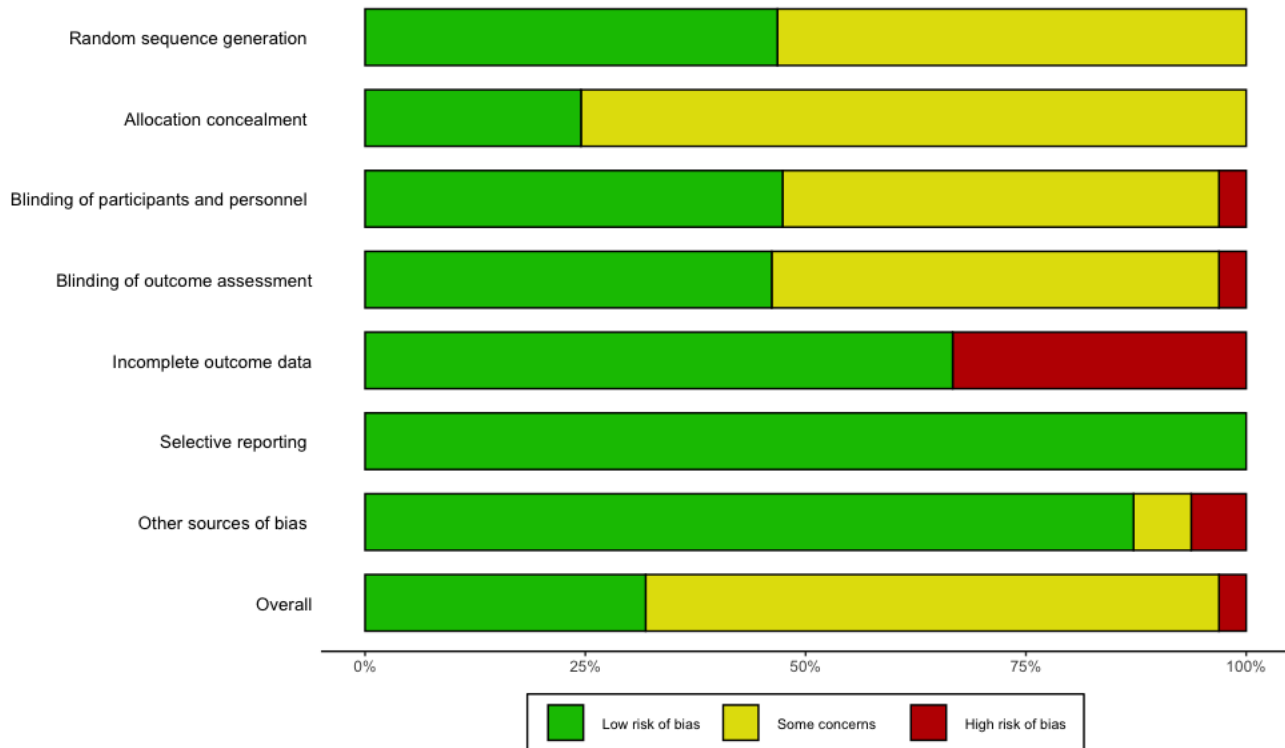

Supplemental Fig. S4. Diagram of publication bias.

Supplement: enm-2021-1374-suppl6.pdf [file enm-2021-1374-suppl6.pdf]
